# Supplementary material for: Redistribution of cadmium in soil aggregates under continuous carbon and nitrogen inputs: insights from sequential extraction and modeling
Source: Royal Society of Chemistry journal article supplement (doi:10.1039/d5em00577a), 2025-12-29
Supplement: d5em00577a1.pdf [file d5em00577a1.pdf]

Supplementary material

**Redistribution of cadmium in soil aggregates under continuous carbon and nitrogen inputs: Insights from sequential extraction and modeling**

Shixun Su, Weiqin Wu, Jiajiang Lin\*, Zuliang Chen\*

Fujian Key Laboratory of Pollution Control and Resource Reuse, College of Environmental and Resource Sciences, Fujian Normal University, Fuzhou 350117, Fujian Province, China

\*Corresponding author address: College of Environmental and Resource Sciences, Fujian Normal University, Fuzhou 350117, Fujian Province, China.

E-mail address: [zlchen@fjnu.edu.cn](mailto:zlchen@fjnu.edu.cn); [jjlin@fjnu.edu.cn](mailto:jjlin@fjnu.edu.cn)

### **Text S1 Tessier Sequential Extraction Procedure**

(i) F1-Cd: Exchangeable. The sediment was extracted at room temperature for 1 h with 8 mL of either magnesium chloride solution (1 M  $\text{MgCl}_2$ , pH 7.0) with continuous agitation.

(ii) F2-Cd: Bound to Carbonates. The residue from (i) was leached at room temperature with 8 mL of 1 M NaOAc adjusted to pH 5.0 with acetic acid (HOAc). Continuous agitation was maintained and the time necessary for complete extraction was evaluated.

(iii) F3-Cd: Bound to Fe- Oxides. The residue from (ii) was extracted with 20 mL of either 0.3 M  $\text{Na}_2\text{S}_2\text{O}_4$  + 0.175 M Na-citrate + 0.025 M H-citrate, or 0.04 M  $\text{NH}_2\text{OH}$ -HCl in 25% (v/v) HOAc. The latter experiments were performed at  $96 \pm 3$  °C with occasional agitation and the time needed for complete dissolution of the free iron oxides was evaluated.

(iv) F4-Cd: Bound to Organic Matter. To the residue from (iii) were added 3 mL of 0.02 M  $\text{HNO}_3$  and 5 mL of 30%  $\text{H}_2\text{O}_2$  adjusted to pH 2 with  $\text{HNO}_3$ , and the mixture was heated to  $85 \pm 2$  °C for 2 h with occasional agitation. A second 3-mL aliquot of 30%  $\text{H}_2\text{O}_2$  (pH 2 with  $\text{HNO}_3$ ) was then added and the sample was heated again to  $85 \pm 2$  °C for 3 h with intermittent agitation. After cooling, 5 mL of 3.2 M  $\text{NH}_4\text{OAc}$  in 20% (v/v)  $\text{HNO}_3$  was added and the sample was diluted to 20 mL and agitated continuously for 30 min. The addition of  $\text{NH}_4\text{OAc}$  is designed to prevent adsorption of extracted metals onto the oxidized sediment.

(v) F5-Cd: Residual. The residue from (iv) was digested with a HF- $\text{HClO}_4$  mixture for total metal analysis.

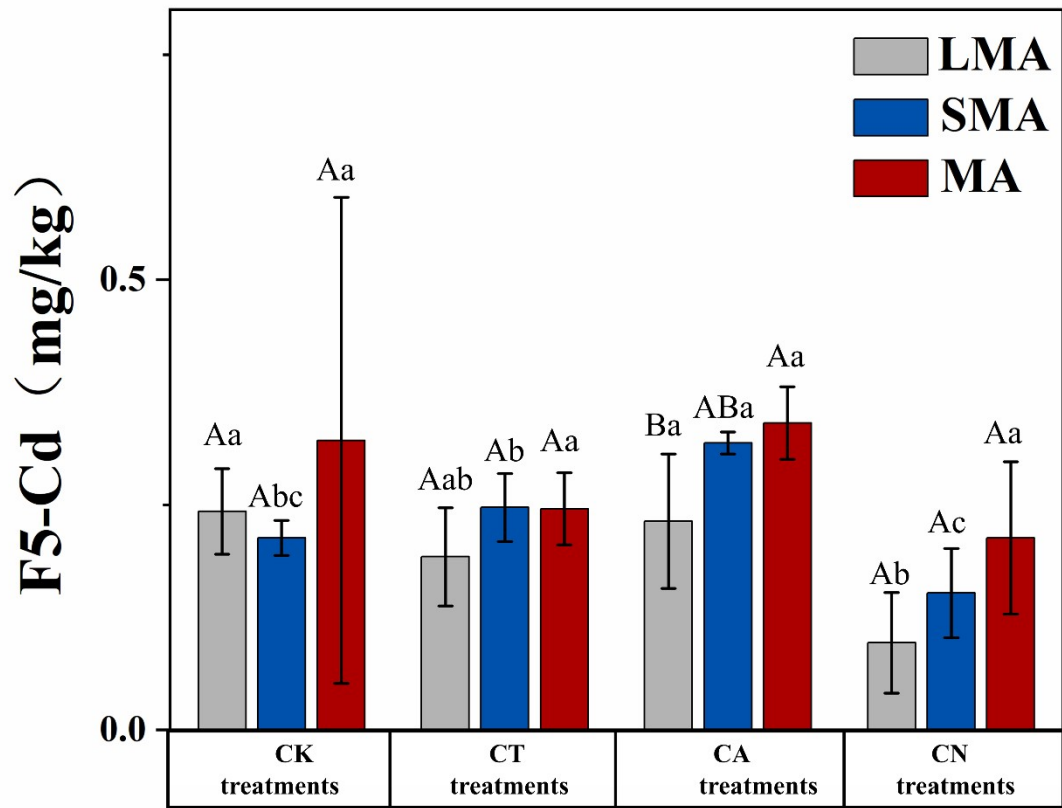

**Fig. S1** The variation of F5-Cd fractions in soil aggregates. CK, control; CT, glucose treatment; CA, glucose + ammonium treatment; CN, glucose + nitrate treatment; a, LMA (>2 mm) aggregate; b, SMA (0.25-2 mm) aggregate; c, MA (< 0.25 mm) aggregate; F5-Cd, residual Cd. Upper-case letters indicate differences between particle sizes while lower-case letters indicate differences between N treatments ( $P < 0.05$ ).

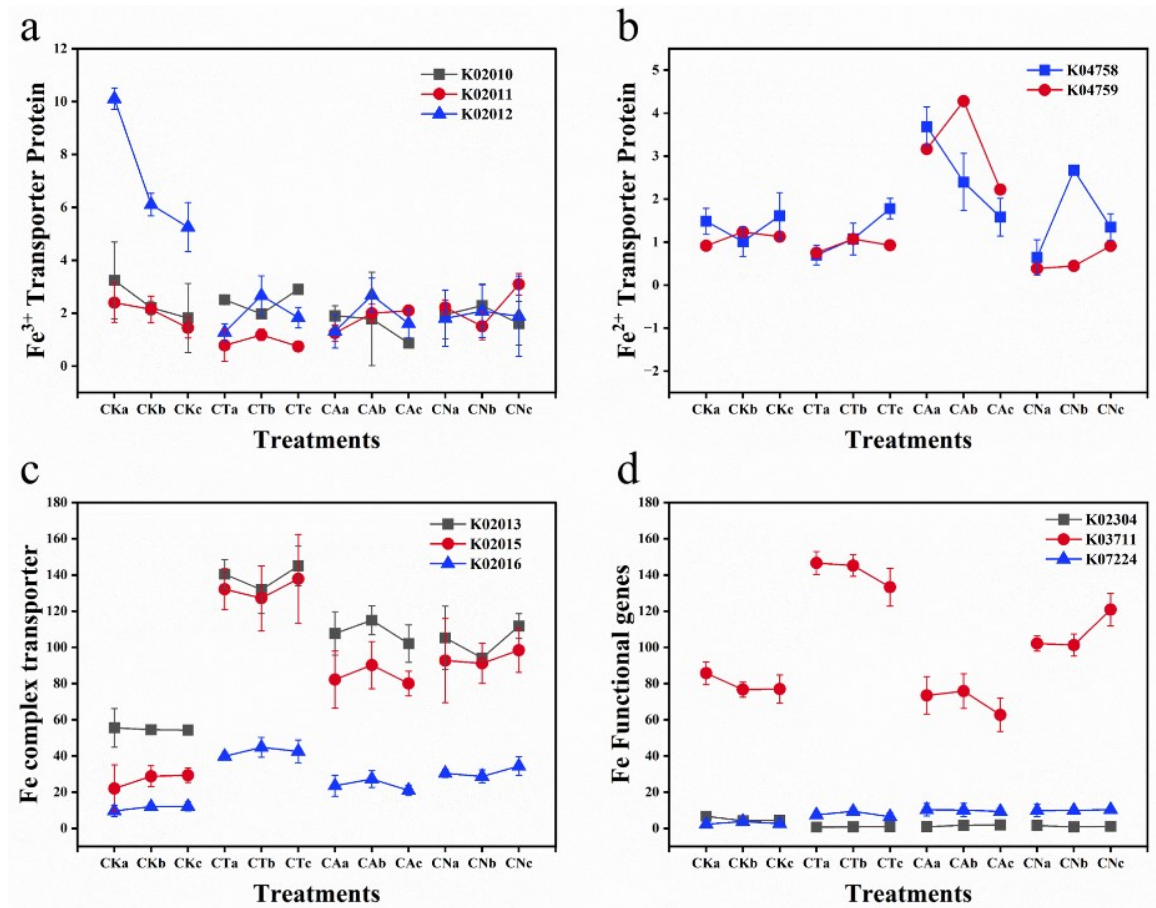

**Fig. S2** Changes in Fe related genes. (a) Gene encoding for Fe<sup>3+</sup> transport protein; (b) Gene encoding for Fe<sup>2+</sup> transport protein; (c) Gene encoding for Fe complex transport protein; (d) Gene encoding for sirolium ferrochloride, Fe uptake regulatory factors, and components of the Fe absorption system. a, large macro-aggregates (LMA, > 2 mm); b, small macro-aggregates (SMA, 0.25-2 mm); c, micro-aggregates (MA, < 0.25 mm).

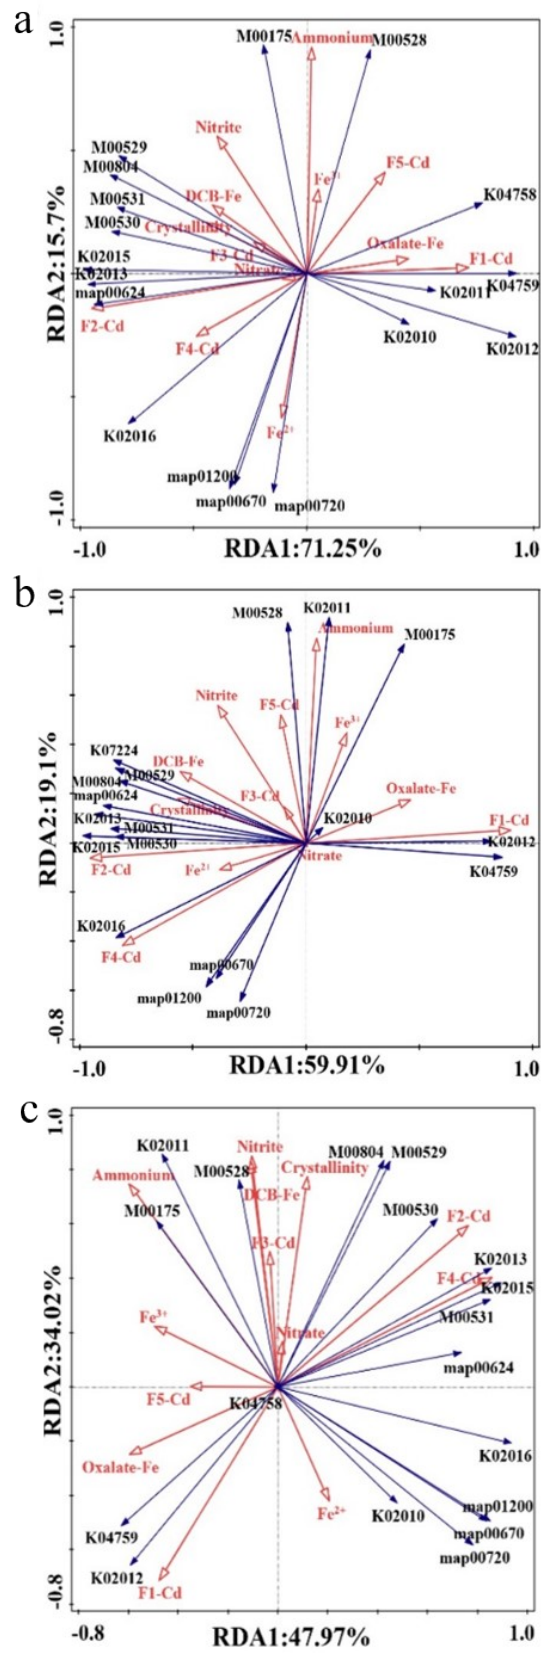

**Fig. S3** Redundancy analysis (RDA) of genes and environmental factors in three soil aggregates. a and b, large macro-aggregates (LMA, >2 mm); c and d, small macro-aggregates (SMA, 0.25-2 mm); e and f, micro-aggregates (MA, < 0.25 mm).

**Table S1** The variation of Fe, Fe associated Cd and mineral N in soil aggregates

|     | DCB-Fe     | oxalate-Fe | HCl-Fe <sup>2+</sup> | HCl-Fe <sup>3+</sup> | Crystallinity | SOC        | DOC           | NO <sub>3</sub> <sup>-</sup> | NO <sub>2</sub> <sup>-</sup> | NH <sub>4</sub> <sup>+</sup> |
|-----|------------|------------|----------------------|----------------------|---------------|------------|---------------|------------------------------|------------------------------|------------------------------|
|     | (g/kg)     | (g/kg)     | (g/kg)               | (g/kg)               |               | (g/kg)     | (mg/kg)       | (mg/kg)                      | (mg/kg)                      | (mg/kg)                      |
| CKa | 12.60±0.06 | 2.28±0.03  | 2.89±0.38            | 4.24±0.06            | 0.65±0.01     | 22.06±0.54 | 657.53±0.70   | 107.51±20.52                 | 3.62±0.01                    | 182.28±3.15                  |
| CKb | 12.33±0.20 | 2.28±0.03  | 2.48±0.69            | 4.12±0.03            | 0.63±0.01     | 19.42±0.05 | 644.52±30.32  | 116.52±2.48                  | 3.56±0.10                    | 168.57±4.01                  |
| CKc | 12.32±0.20 | 2.55±0.02  | 3.03±0.56            | 4.09±0.22            | 0.62±0.01     | 19.43±0.11 | 627.76±10.85  | 107.53±20.51                 | 3.59±0.03                    | 167.09±5.86                  |
| CTa | 12.80±0.27 | 2.23±0.01  | 3.19±0.28            | 4.01±0.12            | 0.65±0.01     | 25.23±0.51 | 987.52±71.25  | 19.73±1.09                   | 3.54±0.08                    | 51.08±37.72                  |
| CTb | 12.75±0.81 | 2.18±0.01  | 2.84±0.36            | 3.69±0.16            | 0.66±0.05     | 20.74±0.41 | 894.55±6.61   | 19.66±0.28                   | 3.57±0.06                    | 71.39±1.03                   |
| CTc | 12.32±0.16 | 2.31±0.01  | 3.09±0.60            | 3.89±0.27            | 0.62±0.02     | 20.84±0.24 | 960.63±7.65   | 19.64±1.13                   | 3.49±0.02                    | 71.56±1.39                   |
| CAa | 13.59±0.60 | 2.12±0.02  | 2.49±0.34            | 4.50±0.82            | 0.76±0.03     | 22.74±0.52 | 1005.37±83.80 | 134.90±68.23                 | 5.46±0.37                    | 467.26±4.08                  |
| CAb | 13.68±0.03 | 2.15±0.01  | 2.57±0.14            | 4.57±0.67            | 0.78±0.01     | 21.68±0.22 | 899.12±13.77  | 116.98±49.70                 | 5.74±0.09                    | 429.29±0.51                  |
| CAC | 13.62±0.09 | 2.40±0.05  | 2.66±0.20            | 4.28±0.22            | 0.71±0.03     | 21.04±0.05 | 946.21±25.26  | 98.88±41.29                  | 5.57±0.30                    | 423.98±5.96                  |
| CNa | 13.97±0.51 | 1.78±0.01  | 2.83±0.32            | 4.42±0.10            | 0.72±0.03     | 23.20±0.43 | 908.35±4.88   | 344.09±5.91                  | 5.21±0.18                    | 166.25±3.95                  |
| CNb | 14.02±0.01 | 1.63±0.01  | 2.62±0.15            | 4.12±0.10            | 0.74±0.01     | 21.08±0.21 | 833.11±4.14   | 313.07±0.01                  | 5.31±0.05                    | 140.90±0.10                  |
| CNc | 13.21±0.48 | 1.86±0.01  | 2.79±0.20            | 3.53±0.31            | 0.70±0.01     | 20.27±0.52 | 822.75±18.73  | 299.16±2.39                  | 5.31±0.06                    | 130.89±0.09                  |

a, large macro-aggregates (LMA, > 2 mm); b, small macro-aggregates (SMA, 0.25-2 mm); c, micro-aggregates (MA, < 0.25 mm).

**Table S2** Fe-related genes and metabolic pathway predicted based on the KEGG database.

| Fe-related genes |            |
|------------------|------------|
| KO               | Gene       |
| K02010           | afuC, fbpC |
| K02011           | afuB, fbpB |
| K02012           | afuA, fbpA |
| K02013           | ABC.FEV.A  |
| K02015           | ABC.FEV.P  |
| K02016           | ABC.FEV.S  |
| K02304           | MET8       |
| K03711           | für, zur   |
| K04758           | feoA       |
| K04759           | feoB       |
| K07224           | efeO       |

**Table S3** N-related metabolic module predicted based on the KEGG database.

| N-related metabolic module |                                 |
|----------------------------|---------------------------------|
| KEGG Module                | Name                            |
| M00175                     | Nitrogen fixation               |
| K00528                     | Nitrification                   |
| K00529                     | Denitrification                 |
| K00530                     | Dissimilatory nitrate reduction |
| K00531                     | Assimilatory nitrate reduction  |
| K00804                     | Complete nitrification          |



**Table S4** C-related metabolic pathway predicted based on the KEGG database.

| C-related metabolic pathway |                                             |
|-----------------------------|---------------------------------------------|
| KEGG Pathway                | Name                                        |
| Map00624                    | Polycyclic aromatic hydrocarbon degradation |
| Map00670                    | One carbon pool by folate                   |
| Map00710                    | Carbon fixation in photosynthetic organisms |
| Map00720                    | Carbon fixation pathways in prokaryotes     |
| Map01200                    | Carbon metabolism                           |
| Map04964                    | Proximal tubule bicarbonate reclamation     |
